# Supplementary material for: The elements of success in a comprehensive state-wide program to safely reduce the rate of preterm birth
Source: PLOS journal article supplement (doi:10.1371/journal.pone.0234033), 2020-06-04
Supplement: S2 (10.1371/journal.pone.0234033.s002) [file journal.pone.0234033.s002]

**Table S2. Gestational age specific risk of preterm birth in the established tertiary level center in unadjusted and adjusted models.**

| GA /Year     | N           | n    | (%) | OR     | 95% CI | p         | aOR   | 95% CI | p         |       |
|--------------|-------------|------|-----|--------|--------|-----------|-------|--------|-----------|-------|
| <b>20-27</b> | <b>2009</b> | 5413 | 136 | 2.51%  | 1.19   | 0.93-1.53 | 0.171 | 1.22   | 0.94-1.58 | 0.141 |
|              | <b>2010</b> | 5510 | 133 | 2.41%  | 1.13   | 0.88-1.45 | 0.358 | 1.17   | 0.90-1.52 | 0.236 |
|              | <b>2011</b> | 5405 | 122 | 2.26%  | 1.06   | 0.82-1.37 | 0.681 | 1.11   | 0.85-1.45 | 0.450 |
|              | <b>2012</b> | 5663 | 127 | 2.24%  | 1.06   | 0.82-1.37 | 0.656 | 1.14   | 0.88-1.49 | 0.324 |
|              | <b>2013</b> | 5452 | 119 | 2.18%  | 1.05   | 0.81-1.36 | 0.694 | 1.15   | 0.88-1.51 | 0.301 |
|              | <b>2014</b> | 5476 | 135 | 2.47%  | 1.17   | 0.91-1.50 | 0.220 | 1.28   | 0.99-1.67 | 0.059 |
|              | <b>2015</b> | 5319 | 113 | 2.12%  | 0.97   | 0.75-1.26 | 0.834 | 1.08   | 0.82-1.42 | 0.580 |
|              | <b>2016</b> | 5304 | 134 | 2.53%  | 1.18   | 0.91-1.51 | 0.208 | 1.29   | 1.00-1.67 | 0.054 |
|              | <b>2017</b> | 5455 | 117 | 2.14%  | 1.00   |           |       | 1.00   |           |       |
| <b>28-31</b> | <b>2009</b> | 5413 | 162 | 2.99%  | 1.22   | 0.97-1.54 | 0.092 | 1.27   | 1.00-1.61 | 0.055 |
|              | <b>2010</b> | 5510 | 150 | 2.72%  | 1.09   | 0.86-1.38 | 0.464 | 1.16   | 0.91-1.48 | 0.245 |
|              | <b>2011</b> | 5405 | 139 | 2.57%  | 1.04   | 0.81-1.32 | 0.782 | 1.09   | 0.85-1.40 | 0.480 |
|              | <b>2012</b> | 5663 | 169 | 2.98%  | 1.21   | 0.96-1.53 | 0.099 | 1.32   | 1.04-1.68 | 0.022 |
|              | <b>2013</b> | 5452 | 159 | 2.92%  | 1.21   | 0.96-1.53 | 0.107 | 1.34   | 1.05-1.70 | 0.019 |
|              | <b>2014</b> | 5476 | 169 | 3.09%  | 1.26   | 1.00-1.59 | 0.048 | 1.39   | 1.10-1.76 | 0.007 |
|              | <b>2015</b> | 5319 | 134 | 2.52%  | 0.99   | 0.78-1.26 | 0.948 | 1.12   | 0.87-1.43 | 0.392 |
|              | <b>2016</b> | 5304 | 157 | 2.96%  | 1.19   | 0.94-1.50 | 0.155 | 1.31   | 1.03-1.66 | 0.029 |
|              | <b>2017</b> | 5455 | 136 | 2.49%  | 1.00   |           |       | 1.00   |           |       |
| <b>32-36</b> | <b>2009</b> | 5413 | 738 | 13.63% | 1.06   | 0.94-1.18 | 0.347 | 1.07   | 0.95-1.20 | 0.271 |
|              | <b>2010</b> | 5510 | 697 | 12.65% | 0.96   | 0.86-1.08 | 0.504 | 0.98   | 0.87-1.10 | 0.756 |
|              | <b>2011</b> | 5405 | 713 | 13.19% | 1.01   | 0.90-1.13 | 0.909 | 1.03   | 0.91-1.15 | 0.678 |
|              | <b>2012</b> | 5663 | 772 | 13.63% | 1.05   | 0.94-1.17 | 0.375 | 1.09   | 0.97-1.22 | 0.134 |
|              | <b>2013</b> | 5452 | 843 | 15.46% | 1.22   | 1.09-1.36 | 0.000 | 1.28   | 1.14-1.43 | 0.000 |
|              | <b>2014</b> | 5476 | 750 | 13.70% | 1.06   | 0.95-1.19 | 0.294 | 1.11   | 0.99-1.25 | 0.067 |
|              | <b>2015</b> | 5319 | 617 | 11.60% | 0.87   | 0.77-0.97 | 0.015 | 0.92   | 0.81-1.03 | 0.156 |
|              | <b>2016</b> | 5304 | 642 | 12.10% | 0.92   | 0.82-1.03 | 0.146 | 0.97   | 0.86-1.09 | 0.580 |
|              | <b>2017</b> | 5455 | 717 | 13.14% | 1.000  |           |       | 1.00   |           |       |

Adjusted logistic regression model included maternal characteristics known at the time of the first antenatal visit. Adjustments included maternal age (<20 or ≥35 years), maternal ethnicity (Caucasian, Indigenous and other ethnicities), smoking during pregnancy, low socioeconomic status, pre-existing diabetes, pre-existing hypertension, asthma, pre-existing other maternal conditions, *in vitro* fertilization, history of stillbirth(s), history of PTB and caesarean section in the preceding pregnancy.

OR=unadjusted odds ratio; aOR=adjusted odds ratio; CI=confidence interval, N=number of births, n=number of preterm births, (%) = PTB incidence rate

OR significantly lower than in 2017; OR significantly higher than in 2017
